# Supplementary material for: Preventive residual insecticide applications successfully controlled Aedes aegypti in Yucatan, Mexico
Source: PubMed Central journal article supplement (PMC9768150; doi:10.1038/s41598-022-26577-1), 2022-12-20

## Supplementary Figures and Tables

### Preventive residual insecticide applications successfully controlled *Aedes aegypti* in Yucatan, Mexico

Gonzalo M Vazquez-Prokopec<sup>1\*</sup>

Azael Che-Mendoza<sup>2</sup>

Oscar D. Kirstein<sup>1</sup>

Wilberth Bibiano-Marin<sup>2</sup>

Gabriela Gonzalez-Olvera<sup>2</sup>,

Anuar Medina-Barreiro<sup>2</sup>

Hector Gomez-Dantes<sup>3</sup>

Norma Pavia-Ruz<sup>4</sup>

Pablo Manrique-Saide<sup>2</sup>

1. Department of Environmental Sciences, Emory University, Mathematics and Science Center, 400 Dowman Drive Ste: E530, Atlanta, GA 30322, USA

2. Unidad Colaborativa para Bioensayos Entomologicos, Universidad Autonoma de Yucatan, Mexico

3. National Institute of Public Health, INSP, Cuernavaca, Mexico.

4. Centro de Investigaciones Regionales, Autonomous University of Yucatan, Merida, Mexico.

*\*Correspondence to:*

*Gonzalo Vazquez-Prokopec.*

*Email: [gmvazqu@emory.edu](mailto:gmvazqu@emory.edu)*

**Table S1.** Schedule of activities throughout the trial and according to the seasonality of *Aedes*-borne viruses (ABV).

| <b>Activities</b>        | <b>Date</b>             | <b>ABV season</b> |
|--------------------------|-------------------------|-------------------|
| Baseline                 | April 10-23, 2018       | Low               |
| <b>TIRS intervention</b> | <b>June 17-26, 2018</b> | <b>Low</b>        |
| 1 month                  | July 22-August 1, 2018  | Medium            |
| 2 months                 | August 19-29, 2018      | High              |
| 3 months                 | September 17-26, 2018   | High              |
| 4 months                 | October 21-28, 2018     | High              |
| 5 months                 | November 18-29, 2018    | High              |
| 6 months                 | December 16-23, 2018    | Medium            |
| 7 months                 | January 23-31, 2018     | Medium            |
| 8 months                 | February 17-27, 2018    | Low               |

**Table S2.** Main parameters for TIRS application in 500 houses of Merida, Mexico (Mean  $\pm$  SD).

| <b>Formulation</b> | <b>Houses treated</b> | <b>Inhabitants / house</b> | <b>Rooms/ house</b> | <b>Rooms treated</b> | <b>Application time (min)/ house</b> | <b>Insecticide solution (ml)/ house</b> | <b>Surface (m<sup>2</sup>) treated per house</b> |
|--------------------|-----------------------|----------------------------|---------------------|----------------------|--------------------------------------|-----------------------------------------|--------------------------------------------------|
| Actellic 300CS     | 248                   | 3.7 $\pm$ 1.7              | 4.4 $\pm$ 1.8       | 3.4 $\pm$ 1.4        | 9.9 $\pm$ 5.1                        | 1213.7 $\pm$ 782.7                      | 40.5 $\pm$ 26.1                                  |
| SumiShield 50WG    | 252                   | 2.6 $\pm$ 2.1              | 4.8 $\pm$ 1.8       | 3.2 $\pm$ 1.4        | 8.8 $\pm$ 4.5                        | 955.9 $\pm$ 603.0                       | 31.9 $\pm$ 20.1                                  |

**Table S3.** Results from a negative binomial GLMM showing the overall effect, the effect on the months when ABVs peak (September-November) and the monthly effect (expressed as months post-intervention, MPI) for the density of *Ae. aegypti* per house.

| Effect    | Parameter       | Estimate | Std. Error | z      | P-value |
|-----------|-----------------|----------|------------|--------|---------|
| Overall   | Actellic 300CS  | -0.6956  | 0.0547     | -12.72 | <0.001  |
| (1-8 MPI) | SumiShield 50WG | -0.435   | 0.053      | -8.21  | <0.001  |
| Peak ABV  | Actellic 300CS  | -0.8266  | 0.0986     | -8.386 | <0.001  |
| (3-5 MPI) | SumiShield 50WG | -0.5672  | 0.0962     | -5.898 | <0.001  |
| 1 MPI     | Actellic 300CS  | -1.1423  | 0.1707     | -6.692 | <0.001  |
|           | SumiShield 50WG | -0.5423  | 0.1616     | -3.356 | <0.001  |
| 2 MPI     | Actellic 300CS  | -1.1066  | 0.1519     | -7.284 | <0.001  |
|           | SumiShield 50WG | -0.865   | 0.143      | -6.05  | <0.001  |
| 3 MPI     | Actellic 300CS  | -0.9359  | 0.1536     | -6.092 | <0.001  |
|           | SumiShield 50WG | -0.6509  | 0.1491     | -4.365 | <0.001  |
| 4 MPI     | Actellic 300CS  | -0.777   | 0.1539     | -5.049 | <0.001  |
|           | SumiShield 50WG | -0.6052  | 0.1507     | -4.017 | <0.001  |
| 5 MPI     | Actellic 300CS  | -0.7587  | 0.1907     | -3.979 | <0.001  |
|           | SumiShield 50WG | -0.4981  | 0.1807     | -2.757 | 0.0058  |
| 6 MPI     | Actellic 300CS  | -0.39    | 0.1412     | -2.762 | 0.0057  |
|           | SumiShield 50WG | -0.2154  | 0.1379     | -1.562 | 0.1182  |
| 7 MPI     | Actellic 300CS  | -0.2717  | 0.1514     | -1.795 | 0.0726  |
|           | SumiShield 50WG | 0.0322   | 0.1527     | 0.211  | 0.8329  |
| 8 MPI     | Actellic 300CS  | -0.2163  | 0.1006     | -2.15  | 0.0316  |
|           | SumiShield 50WG | -0.183   | 0.0972     | -1.883 | 0.0596  |

**Table S4.** Results from a negative binomial GLMM showing the overall effect, the effect on the months when ABVs peak (September-November) and the monthly effect (expressed as months post-intervention, MPI) for the density of bloodfed *Ae. aegypti* females per house. Efficacy (expressed as % reduction compared to the control) is shown with its 95% CI.

|                |                 | Estimate | Std.Error | Z       | P-value  | Efficacy (%) |         |          |
|----------------|-----------------|----------|-----------|---------|----------|--------------|---------|----------|
|                |                 |          |           |         |          | Mean         | Low 95% | High 95% |
| Overall        | Actellic 300CS  | -0.78875 | 0.06487   | -12.159 | <0.001   | 54.6         | 48.4    | 60.0     |
| (1-8 MPI)      | SumiShield 50WG | -0.46053 | 0.06116   | -7.53   | <0.001   | 36.9         | 28.8    | 44.0     |
| Peak (3-5 MPI) | Actellic 300CS  | -0.78875 | 0.06487   | -12.159 | <0.001   | 54.6         | 48.4    | 60.0     |
|                | SumiShield 50WG | -0.46053 | 0.06116   | -7.53   | <0.001   | 36.9         | 28.8    | 44.0     |
|                | Actellic 300CS  | -1.2117  | 0.1797    | -6.741  | <0.001   | 70.2         | 57.9    | 79.2     |
| 1 MPI          | SumiShield 50WG | -0.562   | 0.1602    | -3.508  | <0.001   | 43.0         | 22.0    | 58.4     |
|                | Actellic 300CS  | -1.0071  | 0.1634    | -6.165  | <0.001   | 63.5         | 49.7    | 73.5     |
| 2 MPI          | SumiShield 50WG | -0.9193  | 0.1534    | -5.992  | <0.001   | 60.1         | 46.2    | 70.5     |
|                | Actellic 300CS  | -0.858   | 0.1837    | -4.67   | <0.001   | 57.6         | 39.8    | 70.8     |
| 3 MPI          | SumiShield 50WG | -0.5836  | 0.1715    | -3.403  | <0.001   | 44.2         | 22.0    | 60.5     |
|                | Actellic 300CS  | -0.68341 | 0.20728   | -3.297  | <0.001   | 49.2         | 29.4    | 70.0     |
| 4 MPI          | SumiShield 50WG | -0.39595 | 0.20102   | -1.97   | 0.048873 | 34.2         | 8.4     | 51.6     |
|                | Actellic 300CS  | -0.7877  | 0.241276  | -3.265  | 0.0011   | 55.6         | 49.4    | 60.0     |
| 5 MPI          | SumiShield 50WG | -0.53844 | 0.23158   | -2.325  | 0.0201   | 43.0         | 26.7    | 52.8     |
|                | Actellic 300CS  | -0.63949 | 0.16482   | -3.88   | <0.001   | 47.2         | 27.4    | 62.0     |
| 6 MPI          | SumiShield 50WG | -0.42535 | 0.15584   | -2.729  | 0.006347 | 34.6         | 11.5    | 52.0     |
|                | Actellic 300CS  | -0.40682 | 0.16213   | -2.509  | 0.0121   | 33.4         | 8.4     | 51.6     |
| 7 MPI          | SumiShield 50WG | -0.04116 | 0.15542   | -0.265  | 0.7911   | 0.4          | 0.3     | 29.1     |
|                | Actellic 300CS  | -0.51086 | 0.13087   | -3.904  | <0.001   | 40.0         | 22.7    | 53.8     |
| 8 MPI          | SumiShield 50WG | -0.1828  | 0.12015   | -1.521  | 0.128155 | 16.8         | 0.5     | 34.3     |

**Figure S1. Impact of pre-season TIRS on bloodfed *Ae. aegypti* density.** Estimated mean ( $\pm 95\%$ CI) number of *Ae. aegypti* females with evidence of a recent bloodmeal per house at baseline and 1-8 months post-TIRS application of two long-lasting residual insecticide formulations in Merida, Mexico.

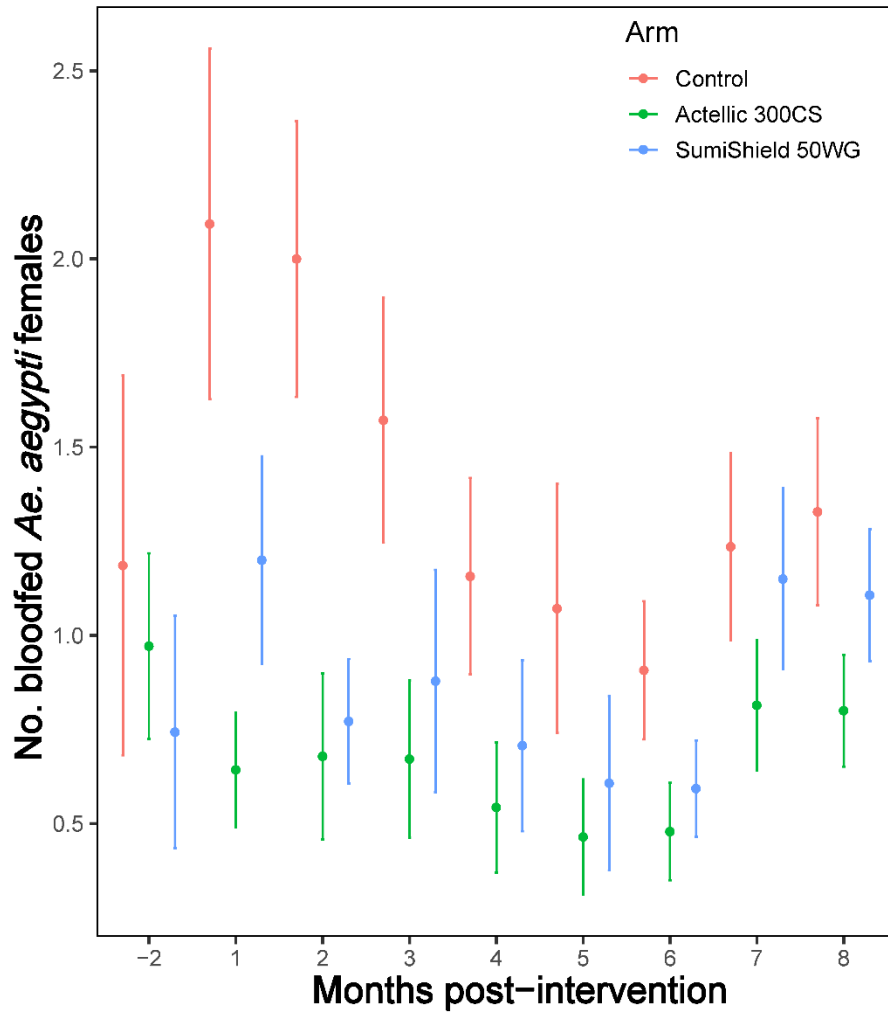

**Figure S2.** Distribution of confirmed dengue virus cases (points) reported by the Ministry of Health in southern Merida, 2018. None of the cases occurred within the study clusters, and vector control actions were focused within one the city block around the block where the cases occurred, as no outbreak was declared to justify city-wide ULV.

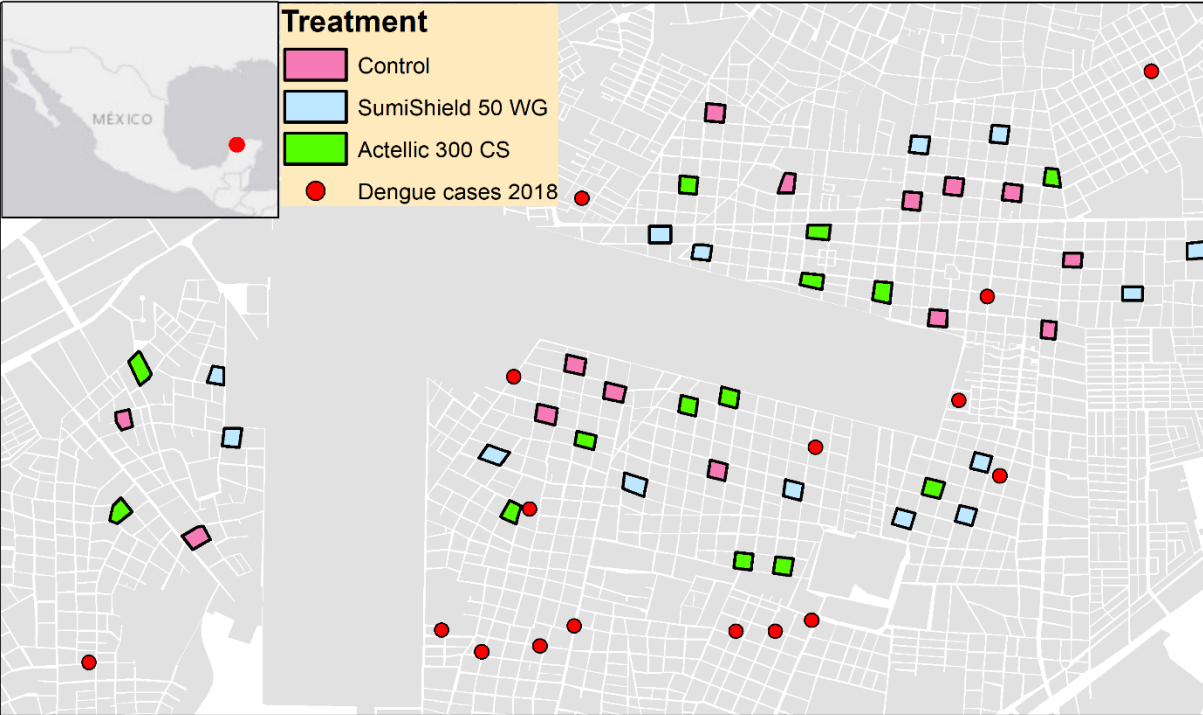

**Figure S3.** Percent knockdown of female *Ae. aegypti* at diagnostic time (30 mins) when exposed to diagnostic dose of permethrin, deltamethrin and chlorpyrifos.

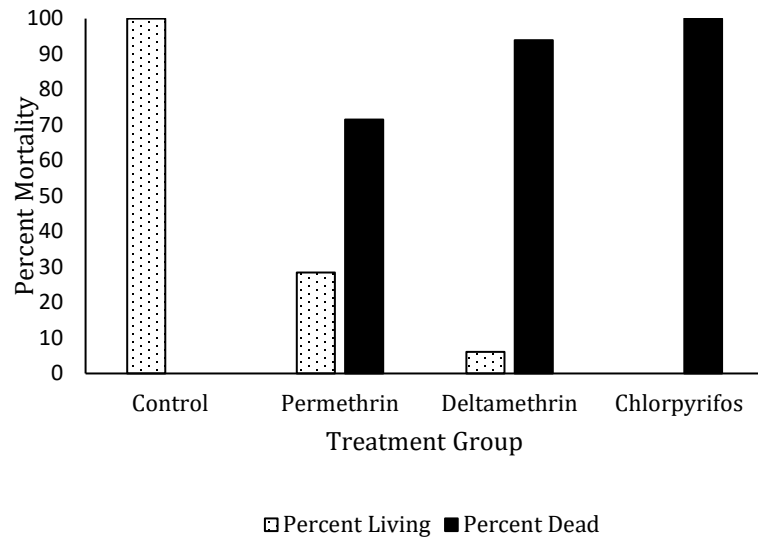

Supplement: 41598_2022_26577_MOESM1_ESM.pdf [file 41598_2022_26577_MOESM1_ESM.pdf]
